# Supplementary material for: The incidence, baseline predictors, and outcomes of dementia in an incident cohort of Parkinson’s disease and controls
Source: PubMed Central journal article supplement (PMC9294013; doi:10.1007/s00415-022-11058-2), 2022-03-21
Supplement: 415_2022_11058_MOESM1_ESM.pdf [file 415_2022_11058_MOESM1_ESM.pdf]

## Supplementary data

**Supplementary Table 1: Dementia annual incidence rates and cumulative proportion who develop dementia in previous PD incident cohorts**

| Study                        | Mean age at dx | Mean motor UPDRS at dx | Incidence rate per 100 person-years (cumulative percentage) at different follow-up durations |           |           |                     |
|------------------------------|----------------|------------------------|----------------------------------------------------------------------------------------------|-----------|-----------|---------------------|
|                              |                |                        | 3-4yrs                                                                                       | 5 yrs     | 7 yrs     | 10 yrs              |
| PARKWEST [8]<br>(n=198)      | 67.5yr         | 22.9                   | 2.1 (9%)                                                                                     |           |           |                     |
| CAMPAIGN [5,9,10]<br>(n=142) | 70.2yr         | 25.5                   | 3.0 (10%)                                                                                    | 3.9 (17%) |           | 5.5 (46%)<br>RR 2.6 |
| NYPUM [11]<br>(n=134)        | 71.3yr         | 26.0                   |                                                                                              | 6.7 (28%) |           |                     |
| PAQUID [12]<br>(n=44)        | 76.7yr         | Not available          |                                                                                              |           | 7.4 (42%) | RR 2.5              |

dx – diagnosis; yr - years

RR = relative risk of dementia in PD versus control population

## **Supplementary Table 2: Potential baseline predictors of PD dementia**

Age

Sex

Education/premorbidity IQ

Motor UPDRS

Smoking

Obesity

Vascular risks including diabetes mellitus

Postural hypotension

Depression

Rapid eye movement (REM) sleep behaviour disturbance

Visual hallucinations

Objective cognitive status / mild cognitive impairment

Subjective cognitive decline

Genes (glucocerebrosidase, apolipoprotein E, microtubule associated protein tau)
